# Supplementary material for: Optimising breathlessness triggered services for older people with advanced diseases: a multicentre economic study (OPTBreathe)
Source: PubMed Central journal article supplement (PMC10176396; doi:10.1136/thoraxjnl-2021-218251), 2022-08-15
Supplement: thoraxjnl-2021-218251supp001.pdf [file thoraxjnl-2021-218251supp001.pdf]

Supplementary information to Yi et al.

## Optimising breathlessness triggered services for older people with advanced diseases: a multicentre economic study (OPTBreathe)

Deokhee Yi, Charles C Reilly, Wei Gao, Irene J Higginson on behalf of OPTBreathe collaborators

### Contents

|                                                                                                                                            |    |
|--------------------------------------------------------------------------------------------------------------------------------------------|----|
| Sample size of the discrete choice experiment .....                                                                                        | 1  |
| Design of choice questions .....                                                                                                           | 1  |
| Administration of discrete choice experiment questionnaire .....                                                                           | 1  |
| Table S1. Participating organisations and recruited participants.....                                                                      | 3  |
| Table S2. Parameters in the Markov model in deterministic analysis .....                                                                   | 4  |
| Table S3. All-cause mortality rate and respiratory mortality rate by age and sex used in the Markov model .....                            | 5  |
| Table S4. Distribution of levels within attributes among choice questions chosen by participants. 6                                        |    |
| Table S5. Incremental cost effectiveness ratio of BSS for 5 years (unit: £) .....                                                          | 7  |
| Table S6. Preferences for attributes and levels of Breathlessness Service: subgroup analysis by patient and carer .....                    | 9  |
| Table S7. Preferences for attributes and levels of Breathlessness Service: subgroup analysis by sex of patient .....                       | 10 |
| Table S8. Preferences for attributes and levels of Breathlessness Service: subgroup analysis by location (London and outside London) ..... | 11 |
| Figure S1. Example choice question presented to respondents .....                                                                          | 12 |
| Figure S2. Decision tree for Markov model analysis of breathless support service.....                                                      | 13 |
| References .....                                                                                                                           | 14 |

## Supplementary information to Yi et al.

### Sample size of the discrete choice experiment

To calculate the sample size of the DCE, we have considered the following:

- 1) Regression analysis needs a sample size larger than the number of independent variables. We will be able to enter up to 20 independent variables and retain up to 14, if the rules of thumb suggested by Altman apply ( $n/10$  variables and square root of sample size respectively).<sup>1</sup> For each predetermined subgroup of the main sample (i.e., diagnosis group), a sample size should be larger than 30
- 2) Due to collecting multiple observations per participant, relatively small sample sizes are required.

In the main phase, we plan to recruit 140 patients and expect approximately 25-30% of carers of them participate as well, this gives us an estimate of 190 participants. We will record multiple observations from each participant (18 data lines per participant—3 alternatives X 6 choice sets). This is within the middle range of samples size of DCEs reviewed, including six in palliative care<sup>2-7</sup> which had 80 to 350 participants. Thus our study will be consistent with usual best practice.

### Design of choice questions

Combination of all attributes produced 864 ( $3 \times 2 \times 4 \times 3 \times 3 \times 4$ ) profiles. Pairs of profiles were to be presented to respondents. Due to practicality and cognitive burden, we reduced the number of pairs with a D-optimal design strategy,<sup>26</sup> after removing implausible combinations, resulting in 18 sets of choices (36 profiles). To further reduce the number of choices presented, we used block design by randomisation. Each respondent faced six choices (see Supplementary Figure S1 for an example choice) and one warm-up at the beginning which was not used in the analysis. We included a third alternative (*Neither*, in which case patients do what they do to manage and treat their breathlessness) in each choice, which represents the current treatment or management of breathlessness and prevents us from overestimating preferences or acceptance.

### Administration of discrete choice experiment questionnaire

DCE questions were administered with background, contextual information and task instructions. We gave a written vignette to respondents and read it aloud to make respondents familiar with the settings and services that BSS was suggesting. We also explain the common and/or different aspects of the BSS from the pulmonary rehabilitation service provided in NHS. We described attributes again prior to starting. Then,

Supplementary information to Yi et al.

there was a warm-up exercise where we asked the participants to describe their current health care service to manage breathlessness in terms of attributes (this tested their understanding of the task, attributes and levels as well as how well they knew the characteristics of the service they were on) and a warm-up example choice set with annotations. We used icons for each level in attributes, unveiling and reading aloud attributes one by one to ensure participants consider each and every one of them when making choices. The vocabulary was user-friendly, checked and improved in pre-pilot and pilot stages, asking participants to explain why they chose the option for each task to detect heuristics and need for improvements in the choice tasks.

Supplementary information to Yi et al.

Table S1. Participating organisations and recruited participants

| Organisation                                         | Participant (n) |       |       |
|------------------------------------------------------|-----------------|-------|-------|
|                                                      | Patient         | Carer | Total |
| King's College Hospital NHS Foundation Trust         | 61              | 27    | 88    |
| Guy's and St Thomas' NHS Foundation Trust            | 26              | 15    | 41    |
| Lewisham and Greenwich NHS Trust                     | 6               | 3     | 9     |
| South Tyneside NHS Foundation Trust                  | 29              | 12    | 41    |
| Derby Hospitals NHS Foundation Trust                 | 13              | 0     | 13    |
| Weston Area Health NHS Trust                         | 8               | 3     | 11    |
| Sherwood Forest Hospitals NHS Foundation Trust       | 27              | 2     | 29    |
| Epsom and St Helier University Hospital NHS Trust    | 6               | 3     | 9     |
| Cambridgeshire and Peterborough NHS Foundation Trust | 14              | 3     | 17    |

Supplementary information to Yi et al.

Table S2. Parameters in the Markov model in deterministic analysis

| Variables                    |                          |                | Parameter |
|------------------------------|--------------------------|----------------|-----------|
| Age                          |                          |                | 75        |
| Uptake probability           | Best scenario (BSS I*)   | Man            | 0.85      |
|                              |                          | Woman          | 0.87      |
|                              | Worst scenario (BSS II*) | Man            | 0.33      |
|                              |                          | Woman          | 0.55      |
| Health and social care costs | Usual care               | Initial status | £3,709    |
|                              |                          | For 12 weeks   | £2,816    |
|                              | BSS plus Usual care      | Initial status | £2,911    |
|                              |                          | For 12 weeks   | £2,844    |
|                              | BSS with lasting effects | Initial status | £2,911    |
|                              |                          | For 24 weeks   | £2,844    |
| Intervention costs           |                          |                | £357.94   |
| QALYs                        | Usual care               | Initial status | 0.35      |
|                              |                          | For 12 weeks   | 0.34      |
|                              | BSS plus Usual care      | Initial status | 0.35      |
|                              |                          | For 12 weeks   | 0.44      |
|                              | BSS with lasting effects | Initial status | 0.35      |
|                              |                          | For 24 weeks   | 0.44      |

Notes: **BSS I** involves the consultations with specialist at outpatient clinic, reviewing both medicinal & non-medicinal treatments, home visits by therapists and support from a social worker. Better mobility and independence at home and outside home, and more social activities are anticipated. Fewer hospital admissions are expected, and patients need to wait 2 weeks to get the first appointment. **BSS II** offers two consultations with GPs or nurses at GP surgeries, reviewing medicinal treatments. There is no additional support provided. Better mobility and independence at home and fewer visits to GP surgeries are anticipated. Waiting time for the first appointment is 8 weeks. Probabilities of taking part in the BSS is derived from the discrete choice experiments data analysis by gender.

## Supplementary information to Yi et al.

Table S3. All-cause mortality rate and respiratory mortality rate by age and sex used in the Markov model

| Age | All cause |          | COPD   |        |
|-----|-----------|----------|--------|--------|
|     | Men       | Women    | Men    | Women  |
| 65  | 0.012319  | 0.00791  |        |        |
| 66  | 0.013587  | 0.008923 | 0.0145 | 0.0094 |
| 67  | 0.014706  | 0.009654 | 0.0145 | 0.0094 |
| 68  | 0.01573   | 0.010405 | 0.0145 | 0.0094 |
| 69  | 0.017378  | 0.011582 | 0.0145 | 0.0094 |
| 70  | 0.019016  | 0.012751 | 0.0227 | 0.0151 |
| 71  | 0.021536  | 0.014342 | 0.0227 | 0.0151 |
| 72  | 0.023826  | 0.016018 | 0.0227 | 0.0151 |
| 73  | 0.026358  | 0.018096 | 0.0227 | 0.0151 |
| 74  | 0.030029  | 0.019863 | 0.0227 | 0.0151 |
| 75  | 0.033498  | 0.022485 | 0.0398 | 0.0277 |
| 76  | 0.037101  | 0.025789 | 0.0398 | 0.0277 |
| 77  | 0.04067   | 0.027839 | 0.0398 | 0.0277 |
| 78  | 0.045081  | 0.03189  | 0.0398 | 0.0277 |
| 79  | 0.050449  | 0.035229 | 0.0398 | 0.0277 |
| 80  | 0.05679   | 0.040488 | 0.0694 | 0.0506 |
| 81  | 0.063335  | 0.045637 | 0.0694 | 0.0506 |
| 82  | 0.071779  | 0.05242  | 0.0694 | 0.0506 |
| 83  | 0.081743  | 0.060183 | 0.0694 | 0.0506 |
| 84  | 0.09171   | 0.068991 | 0.0694 | 0.0506 |
| 85  | 0.103257  | 0.077875 | 0.1241 | 0.0975 |
| 86  | 0.115855  | 0.089264 | 0.1241 | 0.0975 |
| 87  | 0.130367  | 0.101338 | 0.1241 | 0.0975 |
| 88  | 0.147147  | 0.116361 | 0.1241 | 0.0975 |
| 89  | 0.163395  | 0.131781 | 0.1241 | 0.0975 |

Source: Office for National Statistics, Top 10 causes of death by sex and age, England and Wales 1915-2015.

NHS Digital, Compendium of population health indicators, Mortality from bronchitis, emphysema and other COPD (ICD-10 J40 - J44 equivalent to ICD-9 490 - 492, 496), March 2019, Office for National Statistics deaths registered in England and Wales and mid-year population estimates

Supplementary information to Yi et al.

Table S4. Distribution of levels within attributes among choice questions chosen by participants

| Attribute                          | Level                                         | Choice (n) |
|------------------------------------|-----------------------------------------------|------------|
| Place of consultation              | (Neither option)                              | 213        |
|                                    | Home with GP or nurse                         | 473        |
|                                    | GP surgery with GP or nurse                   | 356        |
|                                    | Outpatient clinic with consultant             | 493        |
| Treatment review                   | (Neither option)                              | 213        |
|                                    | Non-medicinal                                 | 569        |
|                                    | Non-medicinal and medicinal                   | 753        |
| Additional support                 | (Neither option)                              | 213        |
|                                    | None                                          | 267        |
|                                    | Physiotherapist and/or occupational therapist | 365        |
|                                    | Social worker                                 | 301        |
| Expectation for breathlessness     | (Neither option)                              | 213        |
|                                    | More mobile at home                           | 415        |
|                                    | More mobile at home and outsides              | 460        |
|                                    | More mobile & social activities               | 447        |
| Expectation for health service use | (Neither option)                              | 213        |
|                                    | Fewer visit to GP clinic                      | 424        |
|                                    | Fewer visit to A&E                            | 423        |
|                                    | Fewer admission to hospital inpatient         | 475        |
| Waiting time (weeks)               | (Neither option)                              | 213        |
|                                    | 1 weeks                                       | 405        |
|                                    | 2 weeks                                       | 329        |
|                                    | 4 weeks                                       | 323        |
|                                    | 8 weeks                                       | 265        |

Note: 213 choice questions out of 1,535 were answered to choose *Neither* option.

Supplementary information to Yi et al.

Table S5. Incremental cost effectiveness ratio of BSS for 5 years (unit: £)

|             | 75 year old man            |                            |                            | 75 year old woman          |                            |                            |
|-------------|----------------------------|----------------------------|----------------------------|----------------------------|----------------------------|----------------------------|
|             | No BSS                     | BSS offered                | BSS with lasting effect    | No BSS                     | BSS offered                | BSS with lasting effect    |
|             | <b>BSS I (P=0.85)</b>      |                            |                            | <b>BSS I (P=0.87)</b>      |                            |                            |
| Costs (£)   | 57,281<br>(27,540, 87,022) | 56,618<br>(27,898, 85,338) | 52,195<br>(28,011, 76,379) | 58,989<br>(33,752, 84,226) | 58,240<br>(33,889, 82,591) | 53,270<br>(32,929, 73,611) |
| QALYs       | 1.325<br>(0.659, 1.992)    | 1.338<br>(0.672, 2.005)    | 1.338<br>(0.790, 1.887)    | 1.363<br>(0.794, 1.931)    | 1.376<br>(0.808, 1.944)    | 1.367<br>(0.896, 1.837)    |
| Δ costs (£) |                            | -663<br>(-1,076, -250)     | -5,086<br>(-5,469, -4,703) |                            | -749<br>(-1,100, -398)     | -5,719<br>(-6,043, 5,395)  |
| Δ QALYs     |                            | 0.013<br>(0.004, 0.022)    | 0.013<br>(0.004, 0.022)    |                            | 0.013<br>(0.005, 0.021)    | 0.004<br>(-0.003, 0.011)   |
| ICER        |                            | -50,789                    | -389,776                   |                            | -56,242                    | -1,454,683                 |
|             | <b>BSS II (P=0.33)</b>     |                            |                            | <b>BSS II (P=0.55)</b>     |                            |                            |
| Costs (£)   | 57,226<br>(27,485, 86,967) | 56,776<br>(28,046, 85,506) | 55,234<br>(27,765, 82,703) | 59,028<br>(33,791, 84,265) | 58,406<br>(34,051, 82,761) | 55,246<br>(32,873, 77,617) |
| QALYs       | 1.324<br>(0.657, 1.990)    | 1.330<br>(0.664, 1.997)    | 1.331<br>(0.704, 1.958)    | 1.363<br>(0.795, 1.932)    | 1.373<br>(0.804, 1.941)    | 1.365<br>(0.856, 1.875)    |
| Δ costs (£) |                            | -450<br>(-864, -36)        | -1,992<br>(-2,397, -1,587) |                            | -622<br>(-973, -271)       | -3,782<br>(-4,119, -3,445) |
| Δ QALYs     |                            | 0.006<br>(-0.003, 0.016)   | 0.007<br>(-0.002, 0.016)   |                            | 0.009<br>(0.001, 0.017)    | 0.002<br>(-0.006, 0.009)   |
| ICER        |                            | -70,686                    | -274,607                   |                            | -67,599                    | -2,200,392                 |



## Supplementary information to Yi et al.

Notes: 95% confidence intervals are in the parentheses. **BSS I** involves the consultations with specialist at outpatient clinic, reviewing both medicinal & non-medicinal treatments, home visits by therapists and support from a social worker. Better mobility and independence at home and outside home, and more social activities are anticipated. Fewer hospital admissions are expected, and patients need to wait 2 weeks to get the first appointment. **BSS II** offers two consultations with GPs or nurses at GP surgeries, reviewing medicinal treatments. There is no additional support provided. Better mobility and independence at home and fewer visits to GP surgeries are anticipated. Waiting time for the first appointment is 8 weeks. Probabilities of taking part in the BSS is derived from the discrete choice experiments data analysis by gender. Costs are in 2014 UK sterling pounds.

Supplementary information to Yi et al.

Table S6. Preferences for attributes and levels of Breathlessness Service: subgroup analysis by patient and carer

|                       |                                | All        |        |        | Patient    |        |        | Carer      |        |        |
|-----------------------|--------------------------------|------------|--------|--------|------------|--------|--------|------------|--------|--------|
|                       |                                | $\beta$    | 95% CI |        | $\beta$    | 95% CI |        | $\beta$    | 95% CI |        |
| Constant              | BSS                            | 1.519      | 1.310  | 1.729  | 1.562      | 1.314  | 1.809  | 1.425      | 1.021  | 1.828  |
| Place of consultation | Home visit                     | 0.145      | 0.056  | 0.235  | 0.113      | 0.009  | 0.217  | 0.248      | 0.067  | 0.429  |
|                       | GP Surgery                     | -0.301     | -0.394 | -0.207 | -0.305     | -0.413 | -0.196 | -0.282     | -0.473 | -0.090 |
|                       | Outpatient clinic              | 0.155      | 0.064  | 0.247  | 0.192      | 0.087  | 0.297  | 0.033      | -0.156 | 0.223  |
| Review                | Non medicinal review           | -0.147     | -0.208 | -0.086 | -0.118     | -0.189 | -0.047 | -0.246     | -0.371 | -0.121 |
|                       | Both reviews                   | 0.147      | 0.086  | 0.208  | 0.118      | 0.047  | 0.189  | 0.246      | 0.121  | 0.371  |
| Additional support    | No additional support          | -0.231     | -0.353 | -0.110 | -0.174     | -0.314 | -0.034 | -0.403     | -0.654 | -0.153 |
|                       | Therapists                     | 0.197      | 0.080  | 0.314  | 0.240      | 0.105  | 0.376  | 0.088      | -0.145 | 0.321  |
|                       | Social worker                  | -0.154     | -0.272 | -0.035 | -0.163     | -0.300 | -0.025 | -0.152     | -0.394 | 0.091  |
|                       | Therapists and social worker   | 0.188      | 0.069  | 0.307  | 0.096      | -0.043 | 0.236  | 0.467      | 0.228  | 0.706  |
| Expectation 1         | Mobile at home                 | -0.124     | -0.216 | -0.032 | -0.117     | -0.223 | -0.011 | -0.159     | -0.350 | 0.032  |
|                       | Mobile at home and outside     | 0.044      | -0.047 | 0.135  | 0.026      | -0.079 | 0.132  | 0.101      | -0.084 | 0.287  |
|                       | Mobile + Social activities     | 0.080      | -0.017 | 0.177  | 0.091      | -0.022 | 0.203  | 0.058      | -0.140 | 0.256  |
| Expectation 2         | Avoid GP visit                 | -0.076     | -0.168 | 0.016  | -0.044     | -0.149 | 0.062  | -0.150     | -0.342 | 0.042  |
|                       | Avoid A&E                      | 0.019      | -0.075 | 0.114  | 0.010      | -0.100 | 0.120  | 0.026      | -0.164 | 0.216  |
|                       | Avoid admission                | 0.056      | -0.038 | 0.151  | 0.033      | -0.077 | 0.143  | 0.124      | -0.067 | 0.314  |
| Time                  | Time for the first appointment | -0.170     | -0.232 | -0.109 | -0.155     | -0.226 | -0.083 | -0.226     | -0.351 | -0.100 |
| N                     |                                | 4,605      |        |        | 2,640      |        |        | 1,965      |        |        |
| Loglikelihood         |                                | -1462.7443 |        |        | -854.45591 |        |        | -603.99594 |        |        |

Notes: There was no difference between London and non-London where the null hypothesis of no difference was not rejected (LR  $X^2=21.77$ ,  $p<0.04$ ).

Supplementary information to Yi et al.

Table S7. Preferences for attributes and levels of Breathlessness Service: subgroup analysis by sex of patient

|                       |                                | All        |        |        | Woman patient |        |        | Man patient |        |        |
|-----------------------|--------------------------------|------------|--------|--------|---------------|--------|--------|-------------|--------|--------|
|                       |                                | $\beta$    | 95% CI |        | $\beta$       | 95% CI |        | $\beta$     | 95% CI |        |
| Constant              | BSS                            | 1.519      | 1.310  | 1.729  | 1.598         | 1.153  | 2.042  | 1.553       | 1.252  | 1.855  |
| Place of consultation | Home visit                     | 0.145      | 0.056  | 0.235  | 0.195         | 0.019  | 0.371  | 0.084       | -0.046 | 0.213  |
|                       | GP Surgery                     | -0.301     | -0.394 | -0.207 | -0.234        | -0.415 | -0.053 | -0.348      | -0.486 | -0.211 |
|                       | Outpatient clinic              | 0.155      | 0.064  | 0.247  | 0.039         | -0.144 | 0.222  | 0.265       | 0.135  | 0.395  |
| Review                | Non medicinal review           | -0.147     | -0.208 | -0.086 | -0.127        | -0.245 | -0.008 | -0.113      | -0.202 | -0.023 |
|                       | Both reviews                   | 0.147      | 0.086  | 0.208  | 0.127         | 0.008  | 0.245  | 0.113       | 0.023  | 0.202  |
| Additional support    | No additional support          | -0.231     | -0.353 | -0.110 | -0.221        | -0.457 | 0.015  | -0.155      | -0.331 | 0.020  |
|                       | Therapists                     | 0.197      | 0.080  | 0.314  | 0.349         | 0.123  | 0.575  | 0.201       | 0.028  | 0.373  |
|                       | Social worker                  | -0.154     | -0.272 | -0.035 | -0.389        | -0.631 | -0.147 | -0.055      | -0.224 | 0.115  |
|                       | Therapists and social worker   | 0.188      | 0.069  | 0.307  | 0.261         | 0.027  | 0.494  | 0.009       | -0.167 | 0.186  |
| Expectation 1         | Mobile at home                 | -0.124     | -0.216 | -0.032 | -0.020        | -0.200 | 0.160  | -0.166      | -0.300 | -0.033 |
|                       | Mobile at home and outside     | 0.044      | -0.047 | 0.135  | 0.006         | -0.172 | 0.184  | 0.036       | -0.097 | 0.170  |
|                       | Mobile+Social activities       | 0.080      | -0.017 | 0.177  | 0.014         | -0.180 | 0.207  | 0.130       | -0.009 | 0.269  |
| Expectation 2         | Avoid GP visit                 | -0.076     | -0.168 | 0.016  | -0.093        | -0.277 | 0.091  | -0.024      | -0.155 | 0.107  |
|                       | Avoid A&E                      | 0.019      | -0.075 | 0.114  | 0.048         | -0.136 | 0.231  | -0.020      | -0.159 | 0.119  |
|                       | Avoid admission                | 0.056      | -0.038 | 0.151  | 0.045         | -0.142 | 0.232  | 0.044       | -0.094 | 0.182  |
| Time                  | Time for the first appointment | -0.170     | -0.232 | -0.109 | -0.087        | -0.211 | 0.038  | -0.194      | -0.283 | -0.105 |
| N                     |                                | 4,605      |        |        | 1,167         |        |        | 2,217       |        |        |
| Loglikelihood         |                                | -1462.7443 |        |        | -354.99113    |        |        | -708.90951  |        |        |

Notes: There was no difference between London and non-London where the null hypothesis of no difference was not rejected (LR  $X^2=797.69$ ,  $p<0.001$ ).

Supplementary information to Yi et al.

Table S8. Preferences for attributes and levels of Breathlessness Service: subgroup analysis by location (London and outside London)

|                       |                                | All        |        |        | London     |        |        | Outside London |        |        |
|-----------------------|--------------------------------|------------|--------|--------|------------|--------|--------|----------------|--------|--------|
|                       |                                | $\beta$    | 95% CI |        | $\beta$    | 95% CI |        | $\beta$        | 95% CI |        |
| Constant              | BSS                            | 1.519      | 1.310  | 1.729  | 1.449      | 1.179  | 1.719  | 1.655          | 1.319  | 1.991  |
| Place of consultation | Home visit                     | 0.145      | 0.056  | 0.235  | 0.113      | -0.006 | 0.231  | 0.189          | 0.052  | 0.326  |
|                       | GP Surgery                     | -0.301     | -0.394 | -0.207 | -0.275     | -0.399 | -0.151 | -0.339         | -0.483 | -0.195 |
|                       | Outpatient clinic              | 0.155      | 0.064  | 0.247  | 0.162      | 0.042  | 0.283  | 0.150          | 0.009  | 0.291  |
| Review                | Non medicinal review           | -0.147     | -0.208 | -0.086 | -0.127     | -0.208 | -0.046 | -0.174         | -0.268 | -0.080 |
|                       | Both reviews                   | 0.147      | 0.086  | 0.208  | 0.127      | 0.046  | 0.208  | 0.174          | 0.080  | 0.268  |
| Additional support    | No additional support          | -0.231     | -0.353 | -0.110 | -0.222     | -0.382 | -0.061 | -0.242         | -0.429 | -0.056 |
|                       | Therapists                     | 0.197      | 0.080  | 0.314  | 0.164      | 0.010  | 0.319  | 0.242          | 0.062  | 0.422  |
|                       | Social worker                  | -0.154     | -0.272 | -0.035 | -0.157     | -0.315 | 0.002  | -0.154         | -0.335 | 0.026  |
|                       | Therapists and social worker   | 0.188      | 0.069  | 0.307  | 0.214      | 0.057  | 0.371  | 0.155          | -0.029 | 0.339  |
| Expectation 1         | Mobile at home                 | -0.124     | -0.216 | -0.032 | -0.115     | -0.238 | 0.008  | -0.137         | -0.277 | 0.002  |
|                       | Mobile at home and outside     | 0.044      | -0.047 | 0.135  | 0.058      | -0.063 | 0.178  | 0.023          | -0.118 | 0.164  |
|                       | Mobile+Social activities       | 0.080      | -0.017 | 0.177  | 0.058      | -0.071 | 0.186  | 0.114          | -0.035 | 0.264  |
| Expectation 2         | Avoid GP visit                 | -0.076     | -0.168 | 0.016  | -0.045     | -0.168 | 0.077  | -0.113         | -0.252 | 0.027  |
|                       | Avoid A&E                      | 0.019      | -0.075 | 0.114  | 0.013      | -0.112 | 0.137  | 0.027          | -0.119 | 0.173  |
|                       | Avoid admission                | 0.056      | -0.038 | 0.151  | 0.032      | -0.093 | 0.158  | 0.085          | -0.059 | 0.230  |
| Time                  | Time for the first appointment | -0.170     | -0.232 | -0.109 | -0.199     | -0.281 | -0.117 | -0.140         | -0.234 | -0.046 |
| N                     |                                | 4,605      |        |        | 2,640      |        |        | 1,965          |        |        |
| Loglikelihood         |                                | -1462.7443 |        |        | -854.45591 |        |        | -603.99594     |        |        |

Notes: There was no difference between London and non-London where the null hypothesis of no difference was not rejected (LR  $\chi^2=8.58$ ,  $p<0.73$ ).

Supplementary information to Yi et al.

Figure S1. Example choice question presented to respondents

| 2 of 6 Choices                                     |                                                                                                                                         |                                                                                                                           |                                     |
|----------------------------------------------------|-----------------------------------------------------------------------------------------------------------------------------------------|---------------------------------------------------------------------------------------------------------------------------|-------------------------------------|
| Place of consultation                              | <br>Outpatient clinic                                  | <br>Home visit by GP                    |                                     |
| Service element 1                                  | <br>Review of non-medical and medicinal treatments     | <br>Review of non-medical treatments    |                                     |
| Service element 2                                  | <br>Home visit by Physio/OT                            | <br>Social worker support               |                                     |
| Your expectation of breathlessness                 | <br>More mobile and independent at home & outside home | <br>More mobile and independent at home |                                     |
| Your expectation of health services                | <br>Fewer visit to GP                                  | <br>Fewer visit to A&E                  |                                     |
| Waiting time for the first appointment             | <br>8 Weeks                                           | <br>4 Weeks                            |                                     |
| Which option would you choose? (tick one box only) | Choose Service A<br><input type="checkbox"/>                                                                                            | Choose Service B<br><input type="checkbox"/>                                                                              | Neither<br><input type="checkbox"/> |

## Supplementary information to Yi et al.

Figure S2. Decision tree for Markov model analysis of breathless support service

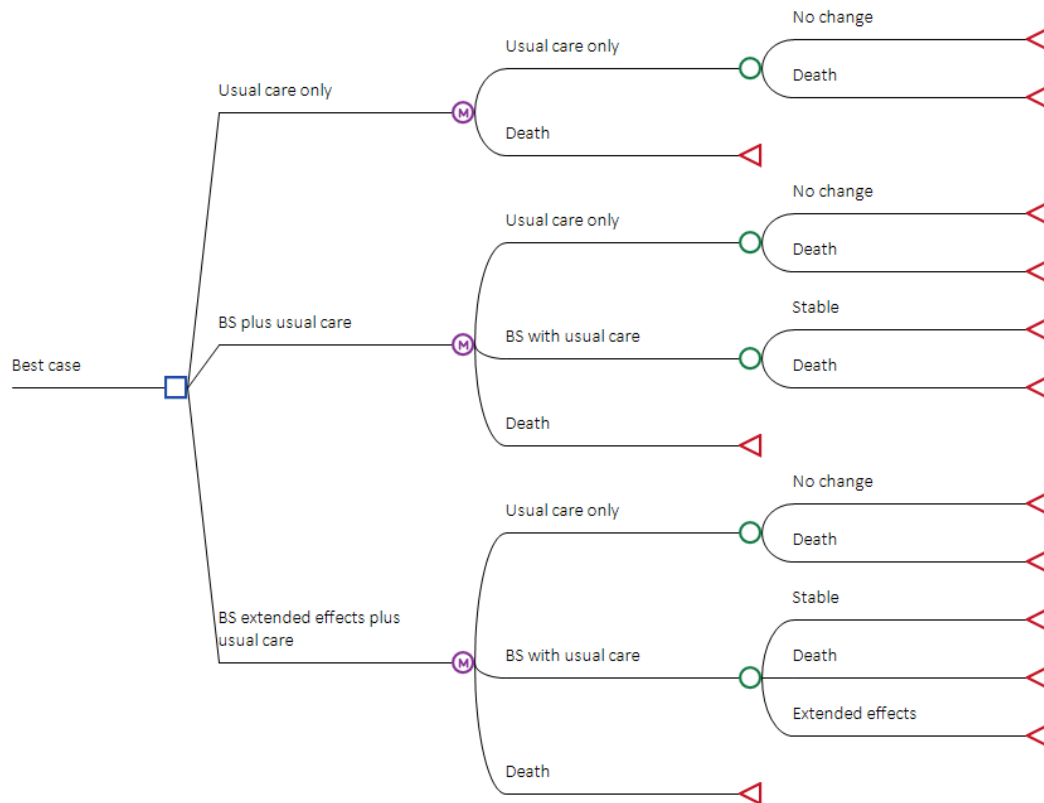

Notes: Probabilities of taking Breathlessness Services as well as age- and sex- specific, all cause and respiratory mortality (see Table S3) was used in defining the transitional chances. Simulations with 10,000 replications were estimated to generate costs and outcomes per person for 5 years (20 cycles).

## Supplementary information to Yi et al.

## References

1. Carmen R, Wilson VanVoorhis BLM. Understanding Power and Rules of Thumb for Determining Sample Sizes. *Tutorials in Quantitative Methods for Psychology* 2007;3(2):43-50.
2. Davison SN, Kromm SK, Currie GR. Patient and health professional preferences for organ allocation and procurement, end-of-life care and organization of care for patients with chronic kidney disease using a discrete choice experiment. *Nephrol Dial Transplant* 2010;25(7):2334-41. doi: 10.1093/ndt/gfq072 [published Online First: 2010/03/09]
3. Concordance in preferences for end of life care between advanced cancer patients and their caregivers in Singapore: A discrete choice experiment. Society for Medical Decision Making (SMDM) Asia-Pacific Conference; 2014; Singapore.
4. Morton RL, Snelling P, Webster AC, et al. Dialysis modality preference of patients with CKD and family caregivers: a discrete-choice study. *Am J Kidney Dis* 2012;60(1):102-11. doi: 10.1053/j.ajkd.2011.12.030 [published Online First: 2012/03/16]
5. Douglas HR, Normand CE, Higginson IJ, et al. A new approach to eliciting patients' preferences for palliative day care: the choice experiment method. *J Pain Symptom Manage* 2005;29(5):435-45. doi: 10.1016/j.jpainsymman.2004.08.017 [published Online First: 2005/05/21]
6. Hall J, Kenny P, Hossain I, et al. Providing Informal Care in Terminal Illness: An Analysis of Preferences for Support Using a Discrete Choice Experiment. *Med Decis Making* 2013 doi: 10.1177/0272989x13500719 [published Online First: 2013/08/15]
7. Casarett D, Fishman J, O'Dwyer PJ, et al. How Should We Design Supportive Cancer Care? The Patient's Perspective. *Journal of Clinical Oncology* 2008;26(8):1296-301. doi: 10.1200/jco.2007.12.8371
